# Supplementary material
Source: MDPI journal article supplement (https://www.mdpi.com/2410-3896/6/3/32)
Supplement: s1 [file s1]

*Article*

# **Supplementary materials for Stress and Strain Prediction of Zirconium Nitride under Oxygen Doping and Vacancy Introduction**

**Junfei Cai <sup>1,2</sup>, Sicheng Wu <sup>1,2</sup> and Jinjin Li <sup>1,\*</sup>**

<sup>1</sup> National Key Laboratory of Science and Technology on Micro/Nan Fabrication, Shanghai Jiao Tong University, Shanghai, 200240, China

<sup>2</sup> Department of Micro/Nano Electronics, School of Electronic Information and Electrical Engineering, Shanghai Jiao Tong University, Shanghai, 200240, China

\* Correspondence: Jinjin Li (lijinjin@sjtu.edu.cn)

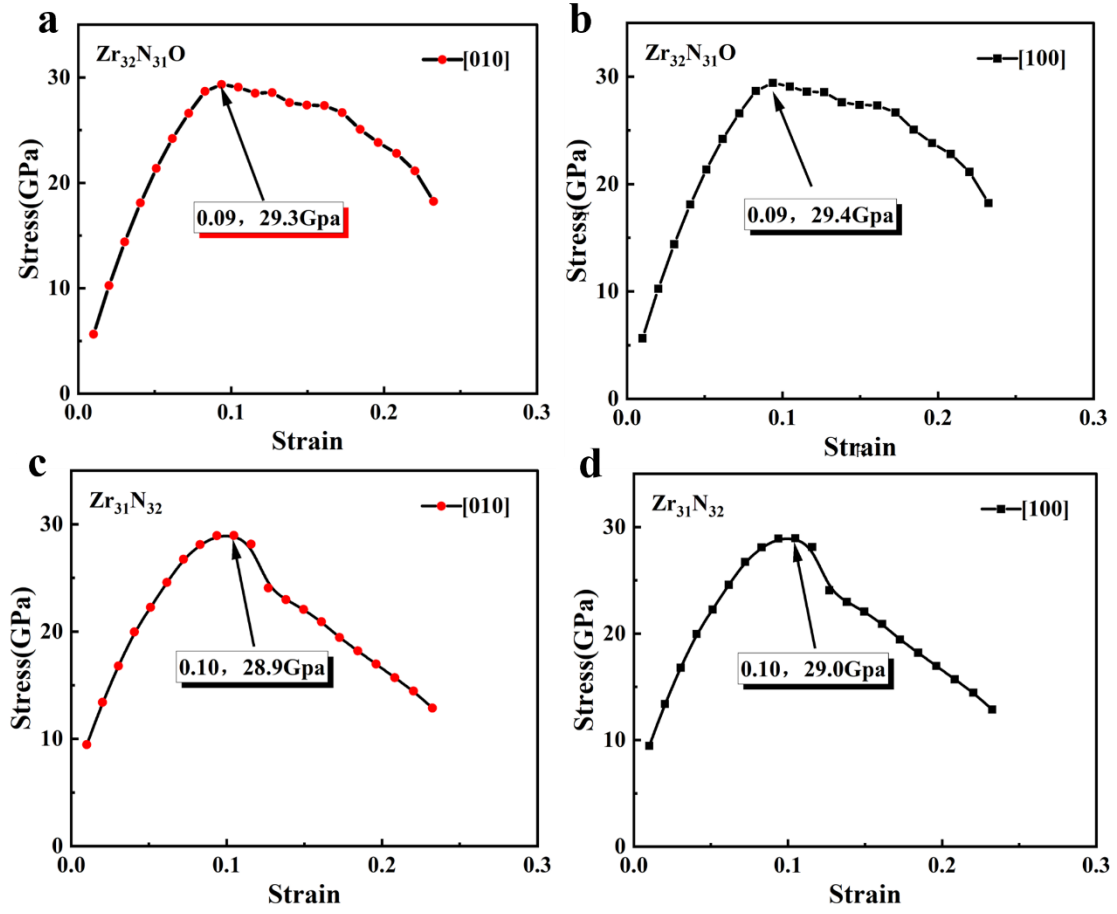

**Figure S1.** (a) Stress-strain relationship of  $Zr_{32}N_{31}O$  in the  $\langle 010 \rangle$  crystallographic direction. (b) Stress-strain relationship of  $Zr_{32}N_{31}O$  in the  $\langle 100 \rangle$  crystallographic direction. (c) Stress-strain relationship of  $Zr_{31}N_{32}$  in the  $\langle 010 \rangle$  crystallographic direction. (d) Stress-strain relationship of  $Zr_{31}N_{32}$  in the  $\langle 100 \rangle$  crystallographic direction.

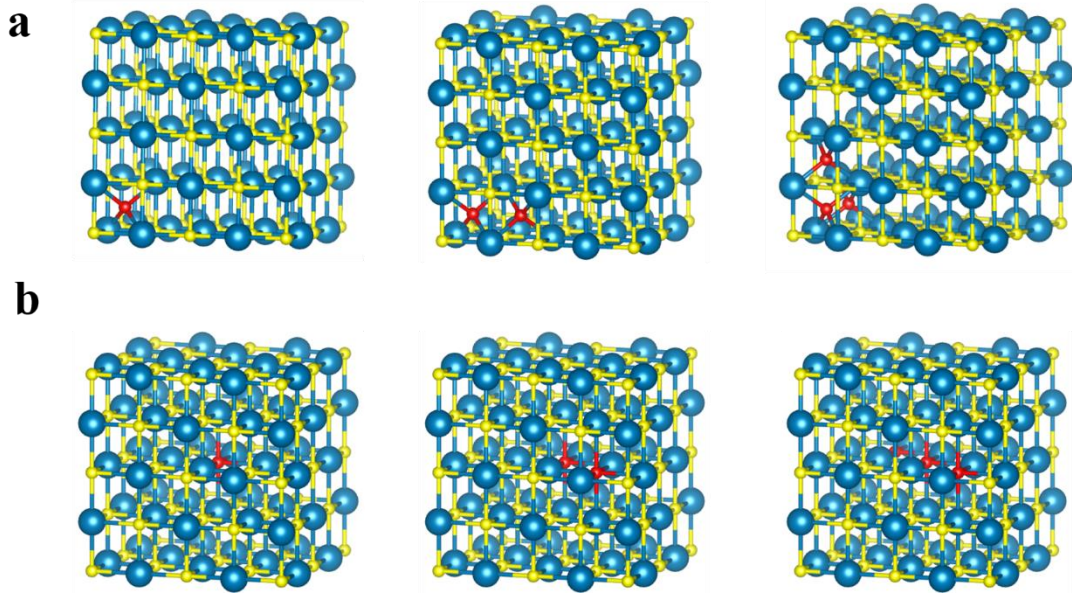

**Figure S2.** The location of the oxygen atoms during the calculation of formation energy. (a) interstitial oxygen atoms (b) substitutional oxygen atoms.

**Table S1.** The total energies in the calculation of the formation energy.

| Configuration          | Energy(eV) | Configuration          | Energy(eV) |
|------------------------|------------|------------------------|------------|
| $E_{Zr_{32}N_{32}O}$   | -657.167   | $E_{Zr_{32}N_{31}O}$   | -649.936   |
| $E_{Zr_{32}N_{32}O_2}$ | -662.515   | $E_{Zr_{32}N_{30}O_2}$ | -647.858   |
| $E_{Zr_{32}N_{32}O_3}$ | -666.963   | $E_{Zr_{32}N_{29}O_3}$ | -645.932   |
